# Supplementary material for: PrPC-Mediated Ca²⁺/Calcineurin/TFEB Signaling Enhances Autophagic-Lysosomal Function and Anti-inflammatory Astrocyte Transition to Alleviate Cerebral Ischemia-Reperfusion Injury
Source: Research Square preprint supplement (doi:10.21203/rs.3.rs-7212124/v1), 2025-07-31
Supplement: Supplementary file 1 [file 893168fd2f48d8e26bb4f361.docx]

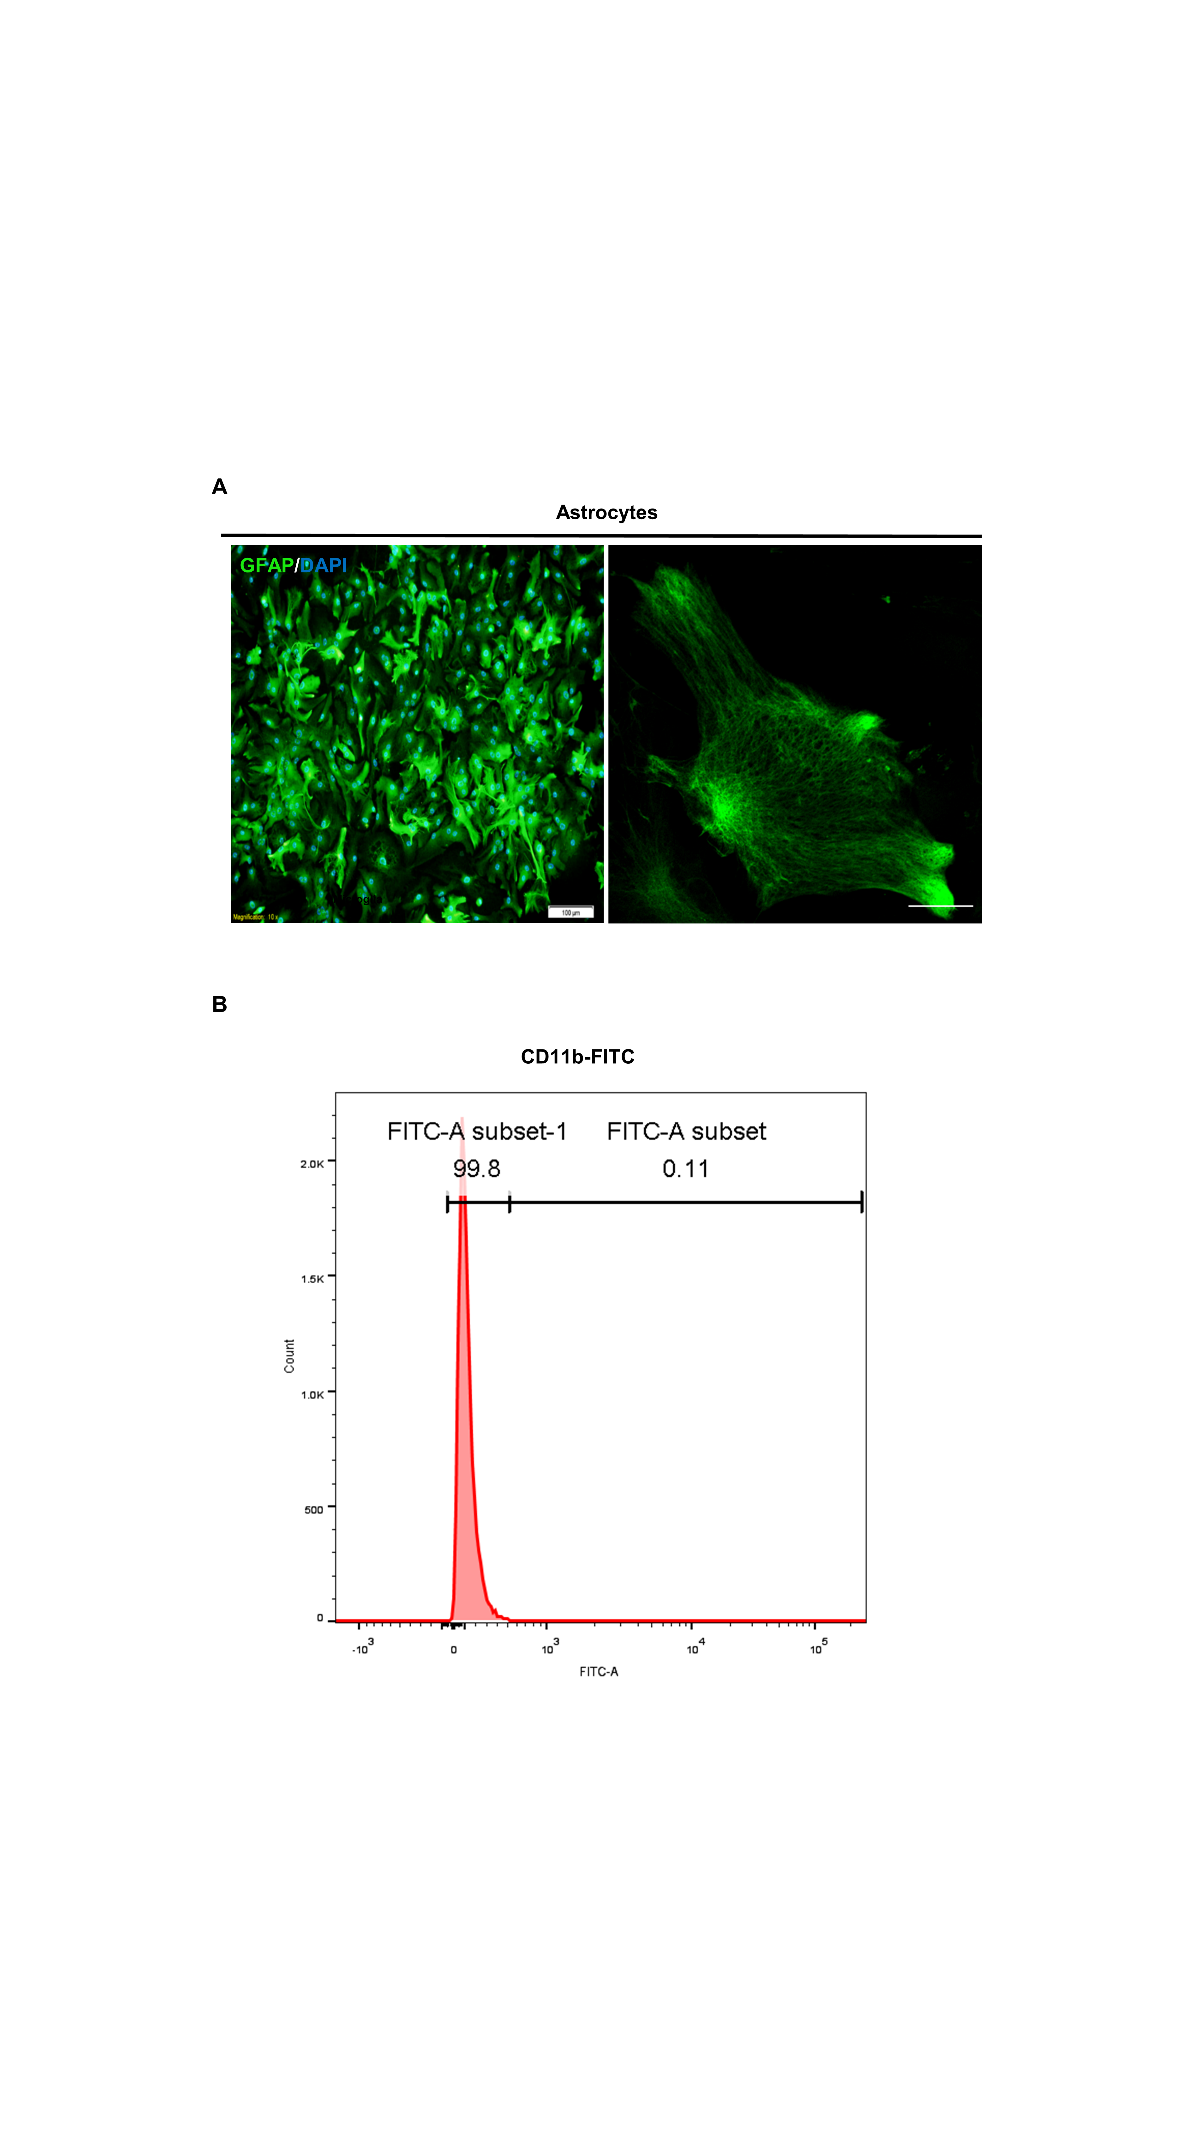


**Figure S1. Confirmation of the Purity of Mouse Primary Cortical Astrocytes Cultured *in Vitro*. (A)** Astrocytes were labeled with GFAP. Immunofluorescence staining revealed GFAP-positive cells, marked by green fluorescence in the cytoplasm, with more than 95% of cells in each field of view staining positive for GFAP. Scale bar: 100 μm or 20 μm. **(B)** Microglia were labeled with CD11b. Flow cytometry analysis showed that fewer than 2% of cells were positive for CD11b


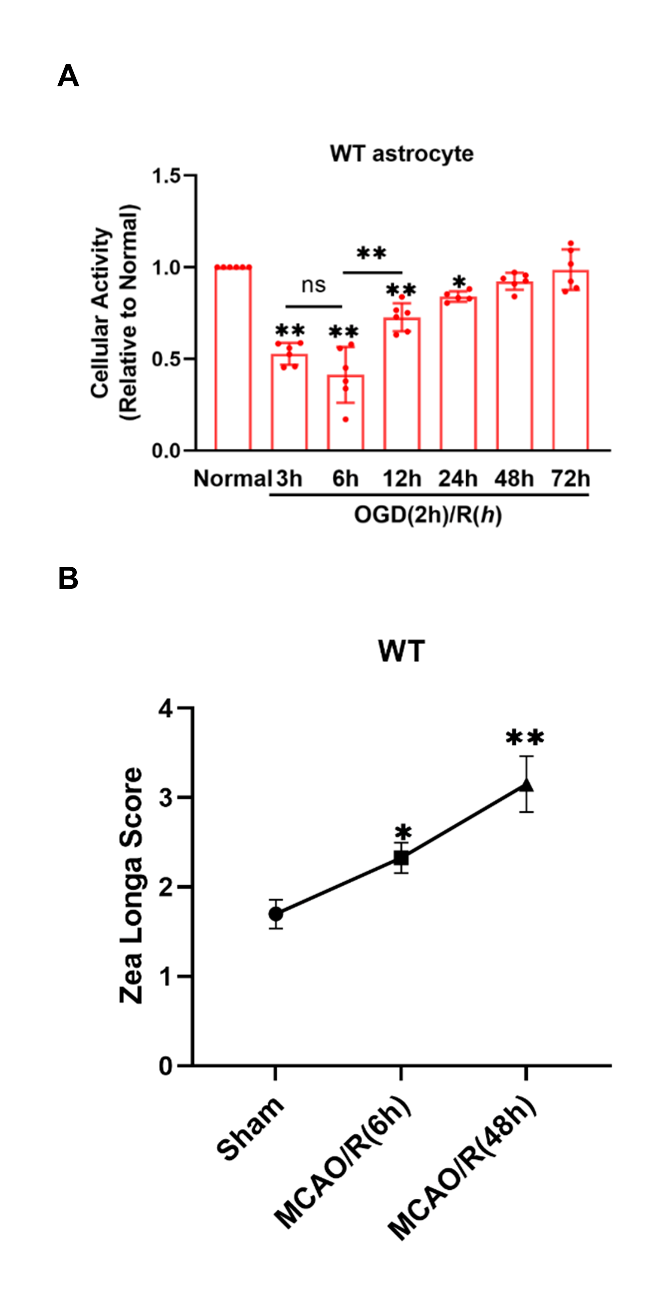


**Figure S2.** (**A**) The time-dependent change of cell viability detected by CCK8 assay in WT mouse primary astrocytes after OGD/R treatment.Statistical comparisons were carried out with ANOVA followed by Tukey’s test. Data are presented as mean±SEM from 6 independent experiments. **P*＜0.05, ***P*＜0.01 vs. normal condition group. (**B**) WT mice behavioral changes 3 hours and 48 hours after tMCAO. **P*＜0.05, ***P*＜0.01 vs. sham group.


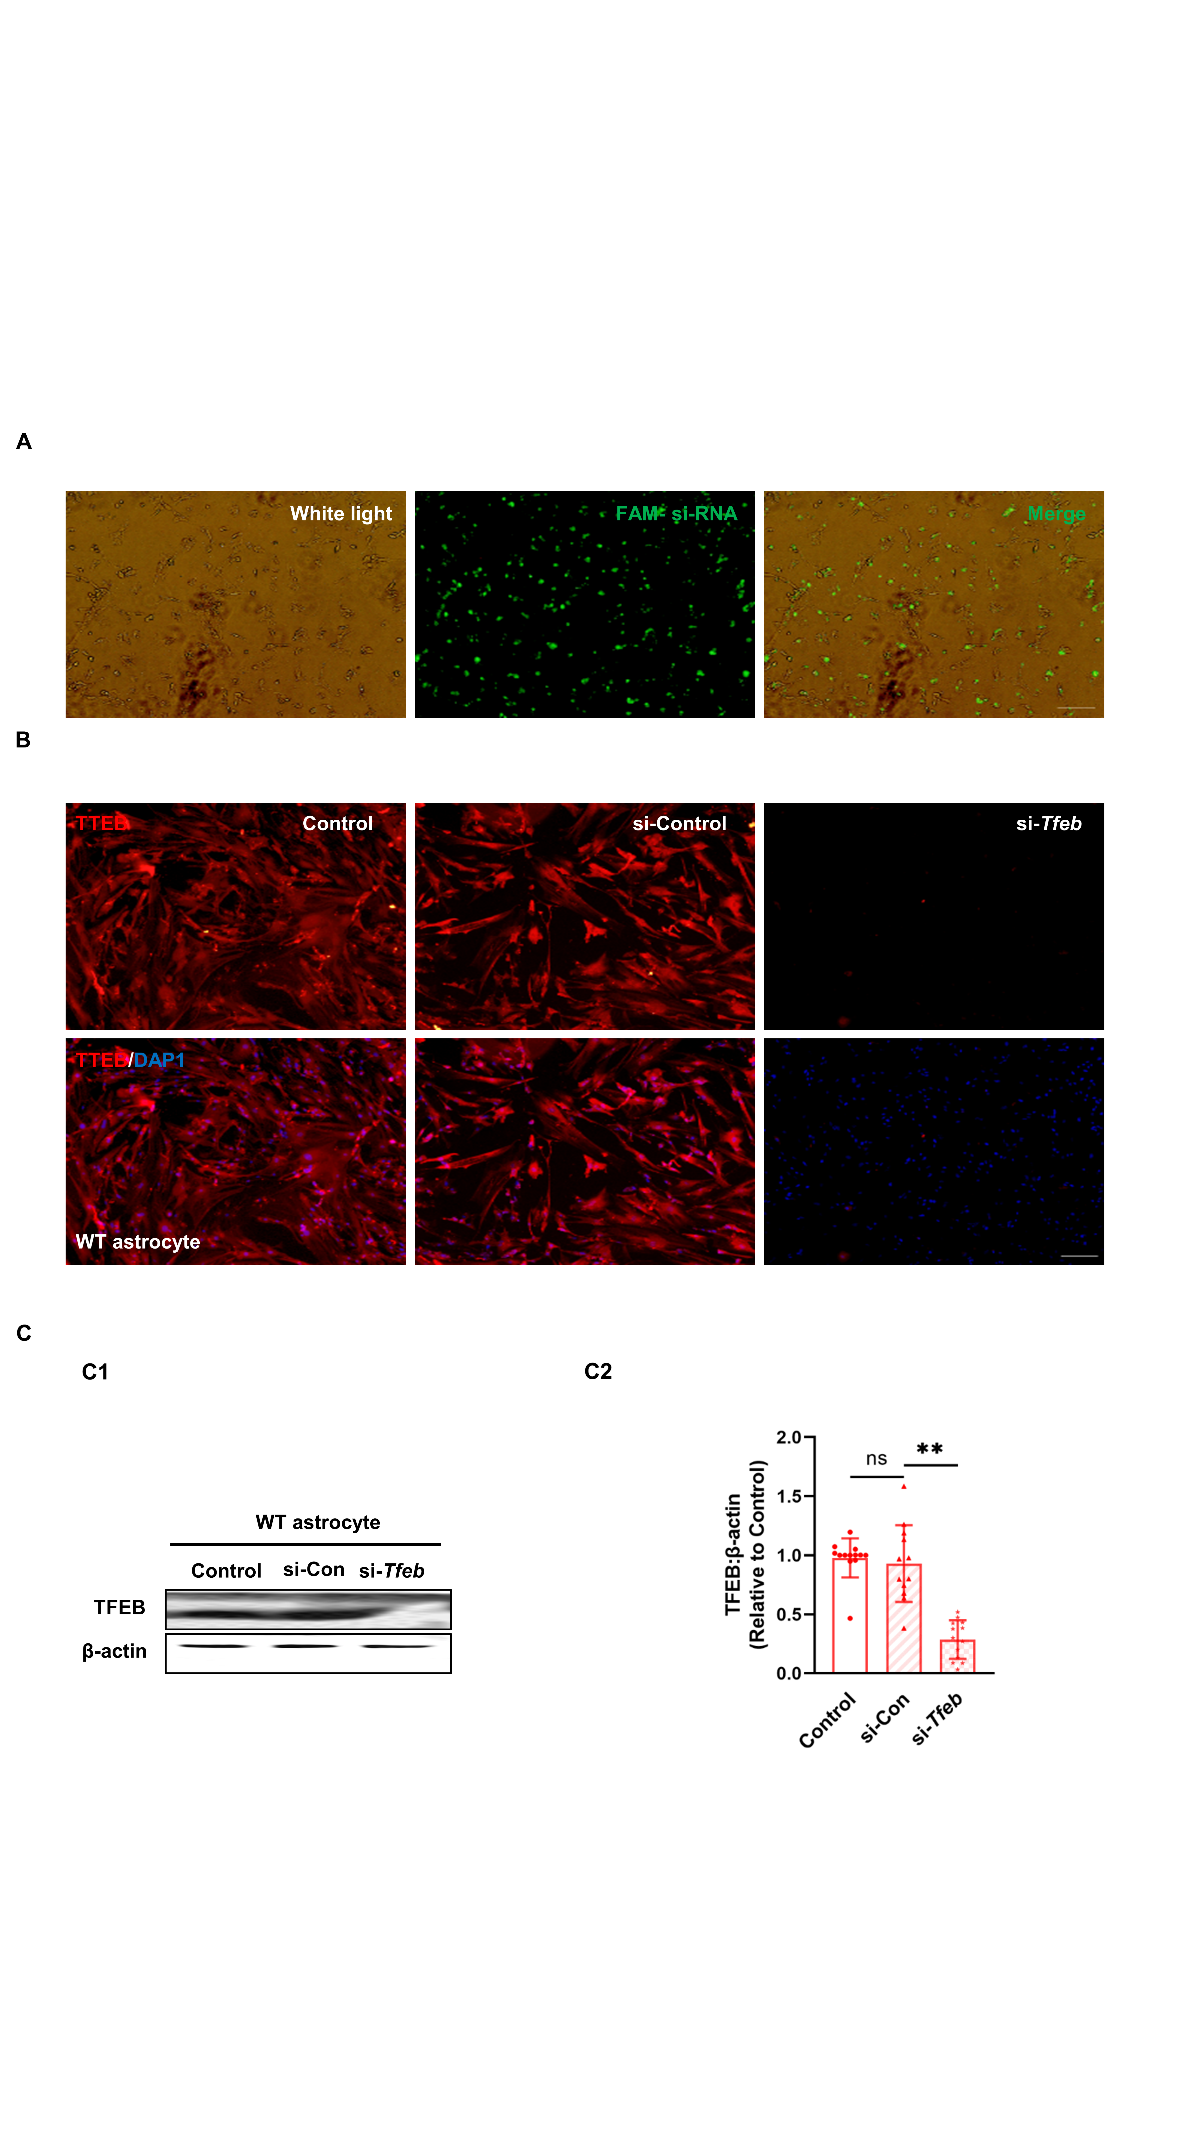


**Figure S3.****siRNA was used to Silence of TFEB Expression in Primary Astrocytes from WT Mice Cultured *In Vitro*.** (**A**) Confirmation of siRNA Transfection Efficiency: FAM-siRNA (green) was used to assess transfection efficiency. Immunofluorescence staining showed that more than 90% of astrocytes in each field of view were positively stained with FAM-siRNA. Scale bar: 200 μm. (**B to C**) Confirmation of si-*Tfeb* Silencing Efficiency: TFEB protein levels were assessed in primary cortical astrocytes. (**B**) Representative images showing TFEB expression (red) in astrocytes. Scale bar: 200 μm.

(**C**) Representative Western blot analysis showing TFEB levels in astrocytes, with β-actin as the loading control. Quantification of TFEB protein expression in cortical astrocytes. Statistical comparisons were performed using ANOVA followed by Tukey's test. Data are presented as mean ± SEM from 12 independent experiments. **P* < 0.01, vs. si-Con group.


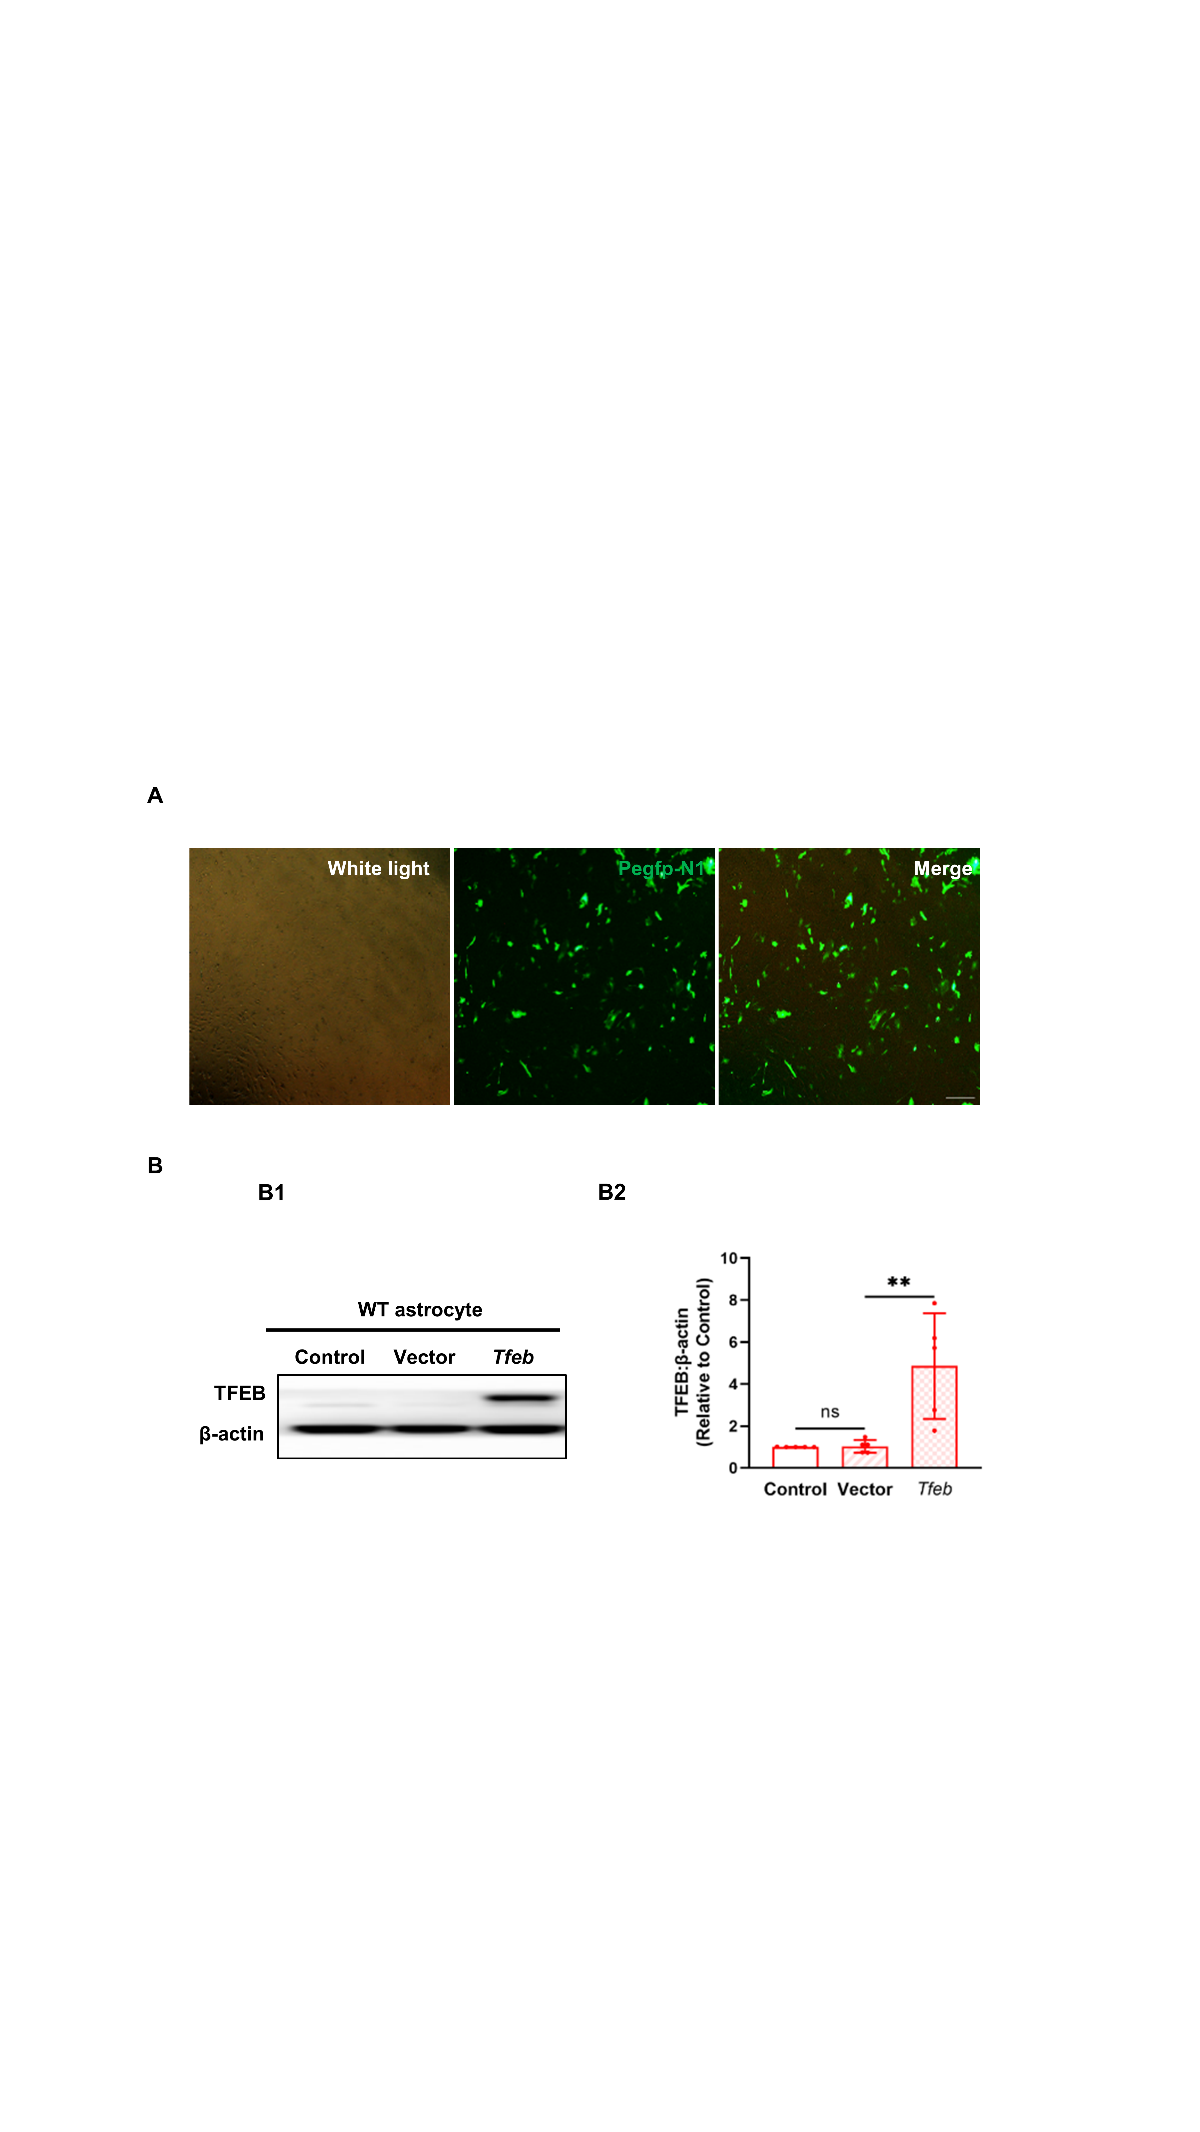


**Figure S4. Plasmid was used to Overexpress *Tfeb* in Primary Astrocytes from WT Mice Cultured *In Vitro*. (A)** Confirmation of Plasmid Transfection Efficiency: Fluorescent empty plasmid Pegfp-N1 (green) was used to assess transfection efficiency. Immunofluorescence staining showed that more than 70% of astrocytes in each field of view were positively stained for Pegfp-N1. Scale bar: 200 μm. (**B**) Confirmation of *Tfeb* Overexpression: TFEB protein levels were assessed in primary cortical astrocytes. (**B**) Representative Western blot showing TFEB expression in astrocytes, with β-actin used as a loading control. Quantification of TFEB protein expression in cortical astrocytes. Statistical comparisons were performed using ANOVA followed by Tukey’s test. Data are presented as mean ± SEM from 5 independent experiments. **P* < 0.01 vs. Victor group


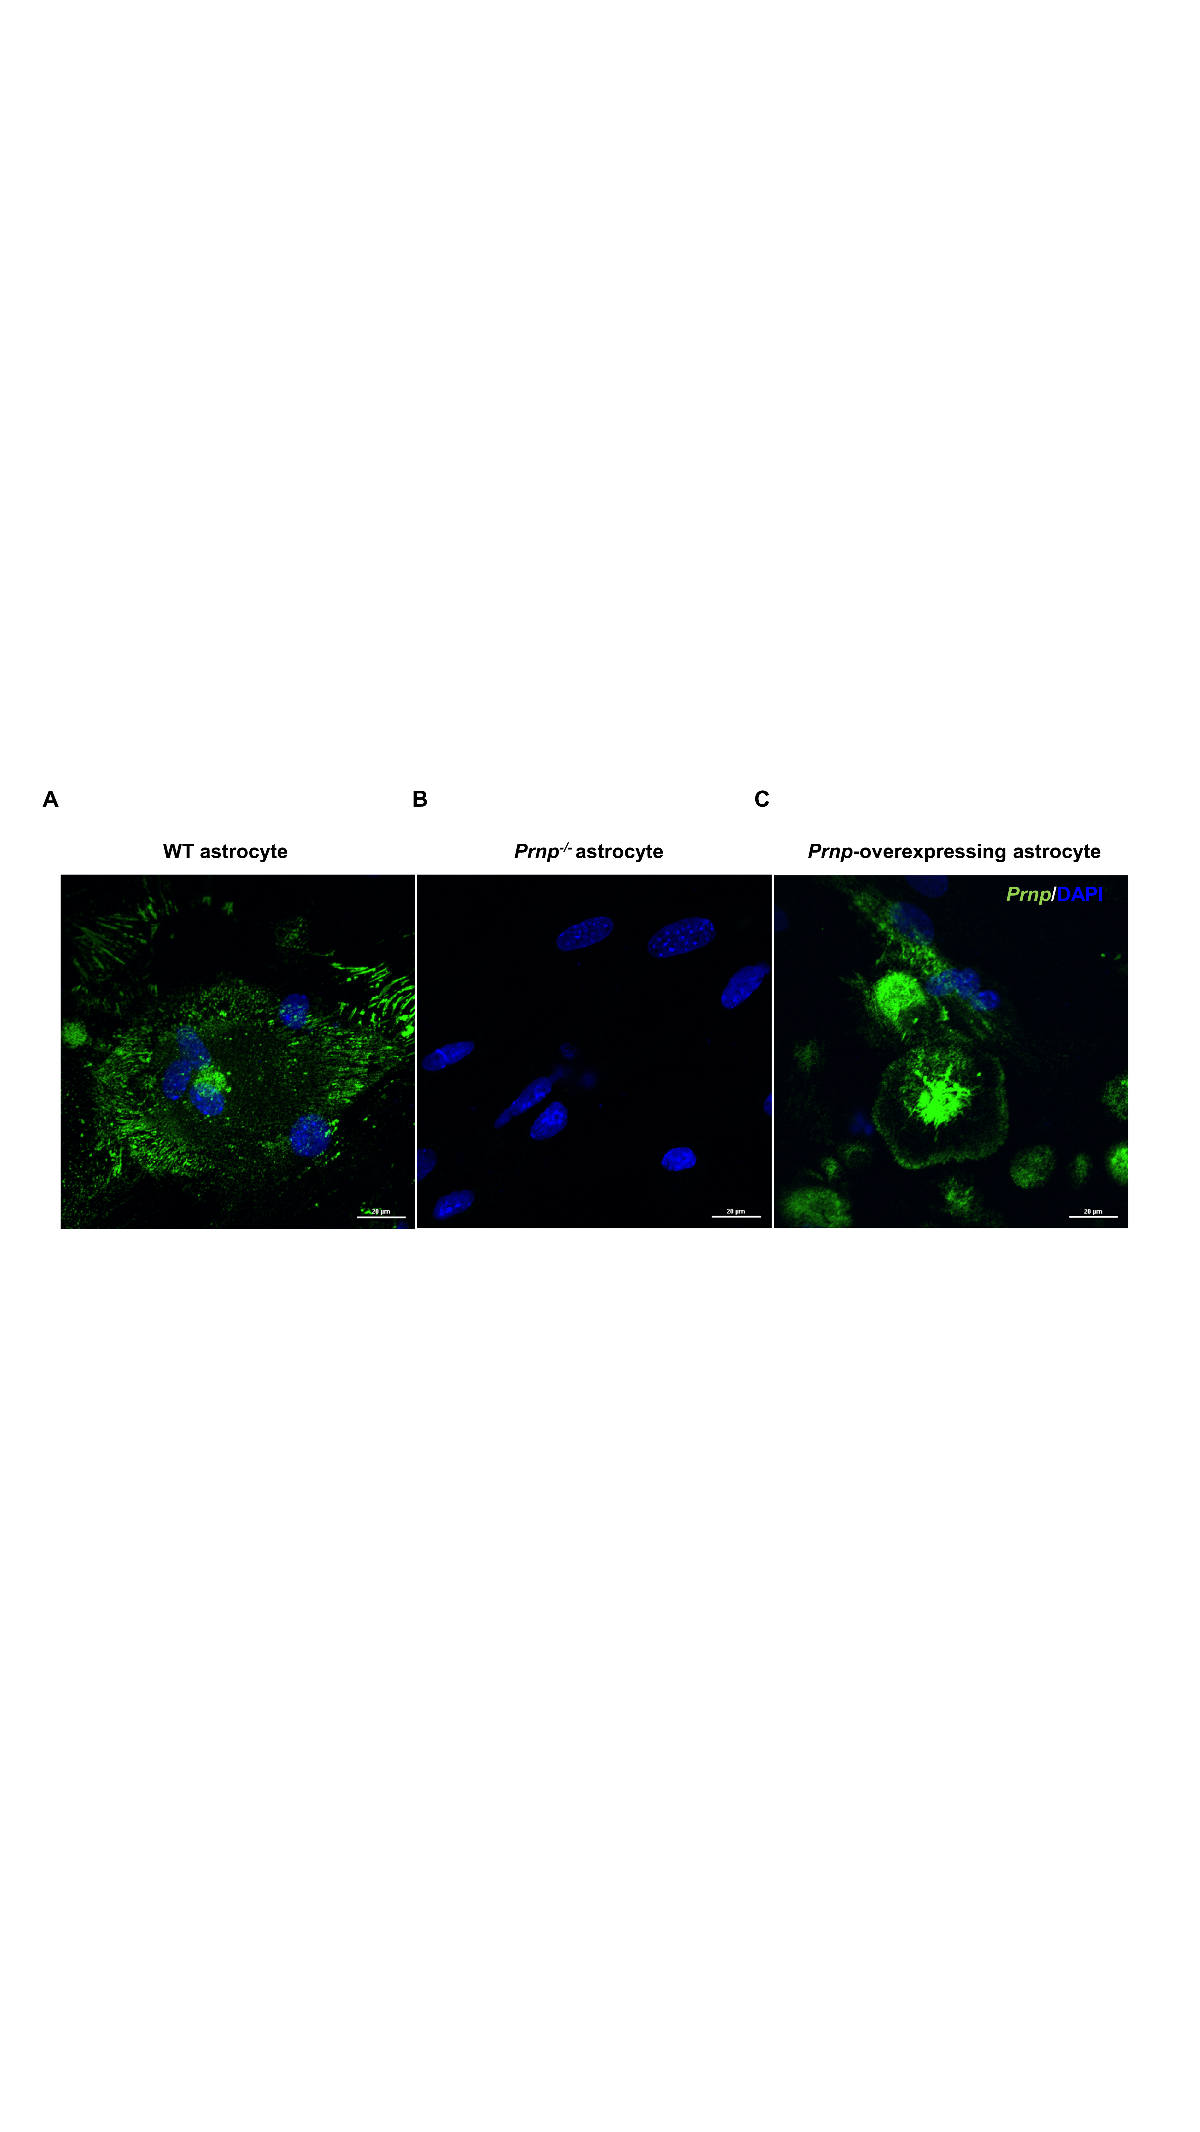


**Figure S5.** **Confirmation of PrPC expression in primary astrocytes from FVB/N (WT, *Prnp*-/- or *Prnp*- overexpressing) mice cultured *in vitro*.** Immunofluorescence staining revealed PrPC expression as green fluorescence located in the cytoplasm and cell membrane, with the nucleus stained blue by DAPI. The staining results demonstrated significant differences in PrPC protein expression between WT, *Prnp*-/-, and *Prnp*-overexpressing astrocytes, consistent with the expected outcomes based on genotype. Scale bar: 20 μm.
